# Supplementary material for: Evaluation of the Photocatalytic Properties of Copper Oxides/Graphene/TiO2 Nanoparticles Composites
Source: MDPI journal article supplement (doi:10.3390/molecules27185803), 2022-09-07
Supplement: s1 [file s1]

## Supplementary Material

# Evaluation of the photocatalytic properties of copper oxides/graphene/TiO<sub>2</sub> nanoparticles composites

Dragos Cosma<sup>1</sup>, Alexandra Urda<sup>1,2</sup>, Teodora Radu<sup>1</sup>, Marcela C. Rosu<sup>1</sup>, Maria Mihet<sup>1</sup>, Crina Socaci<sup>\*1</sup>

<sup>1</sup>National Institute for Research and Development of Isotopic and Molecular Technologies – INCDTIM,  
67-103 Donat Street, 400293, Cluj-Napoca, Romania

<sup>2</sup>Faculty of Chemistry and Chemical Engineering, Babes-Bolyai University, 11 Arany Janos Street, 400028,  
Cluj-Napoca, Romania

\*Correspondence: [crina.socaci@itim-cj.ro](mailto:crina.socaci@itim-cj.ro)

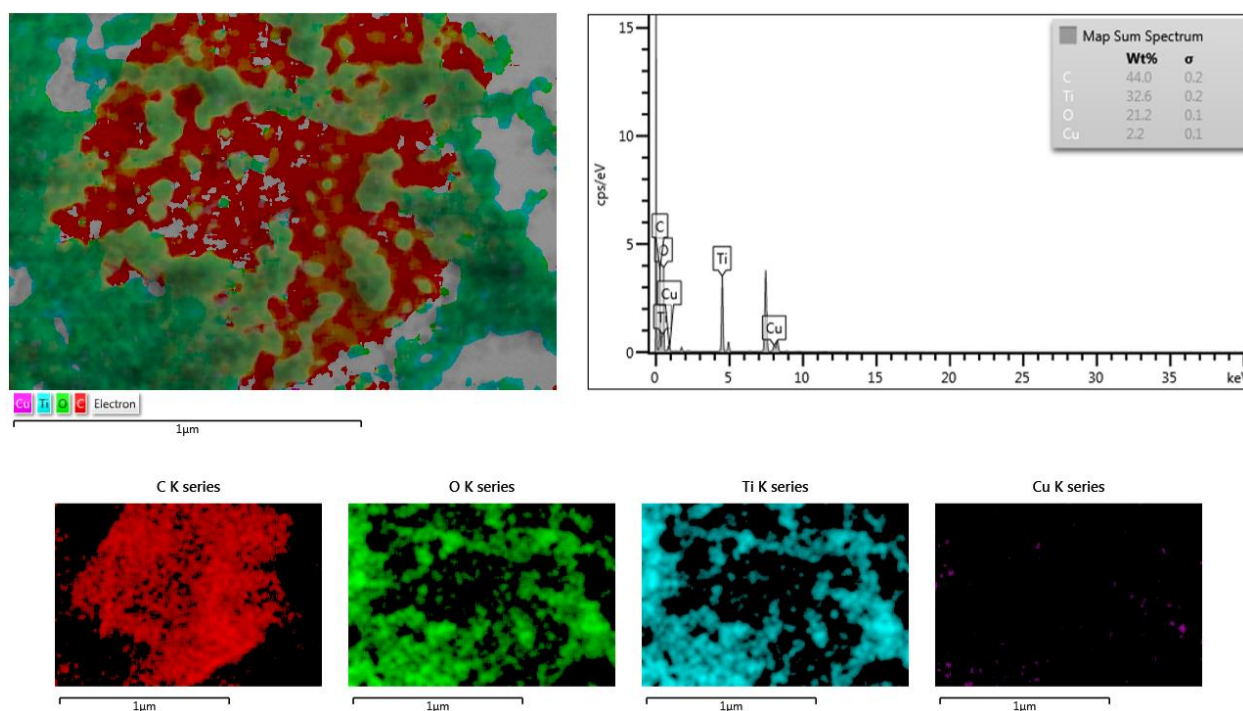

**Figure S1.** Element mapping images of Cu(2%)-TiO<sub>2</sub>-trGO300 revealing the distribution of C (red), O (green), Ti (cyan) and Cu (magenta) elements and the corresponding EDX spectrum.

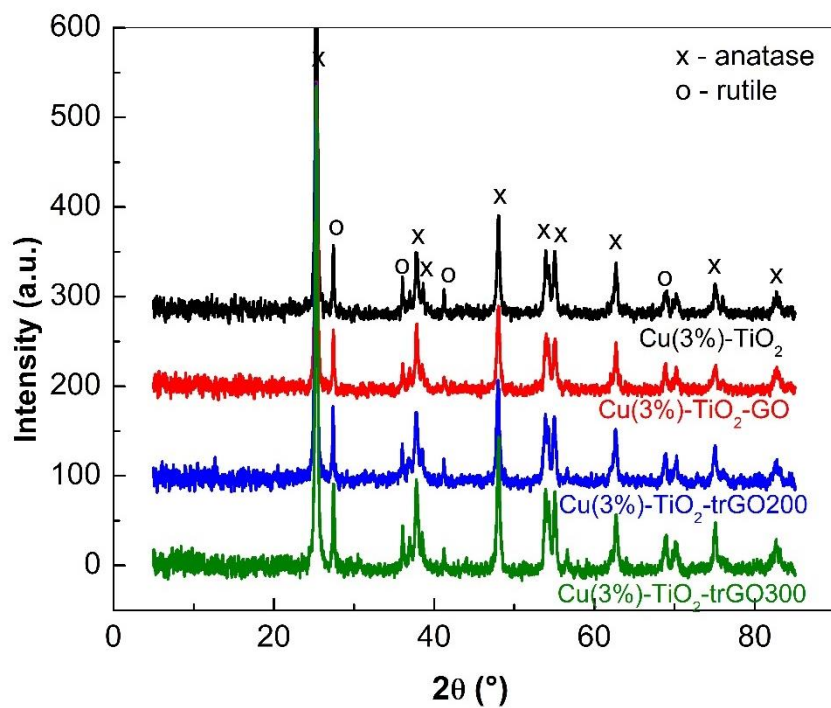

**Figure S2.** The XRD patterns of Cu(3%)-TiO<sub>2</sub>-graphene composites.

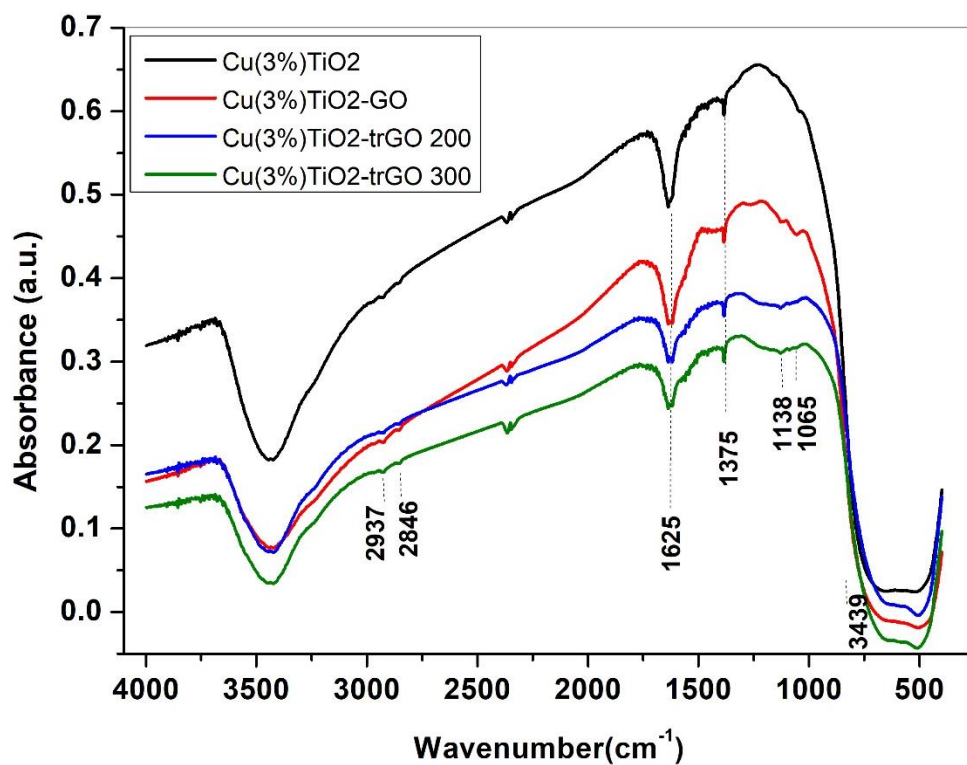

**Figure S3.** The FT-IR spectra of Cu(3%)-TiO<sub>2</sub>-graphene composites comparatively with Cu(3%)-TiO<sub>2</sub>.

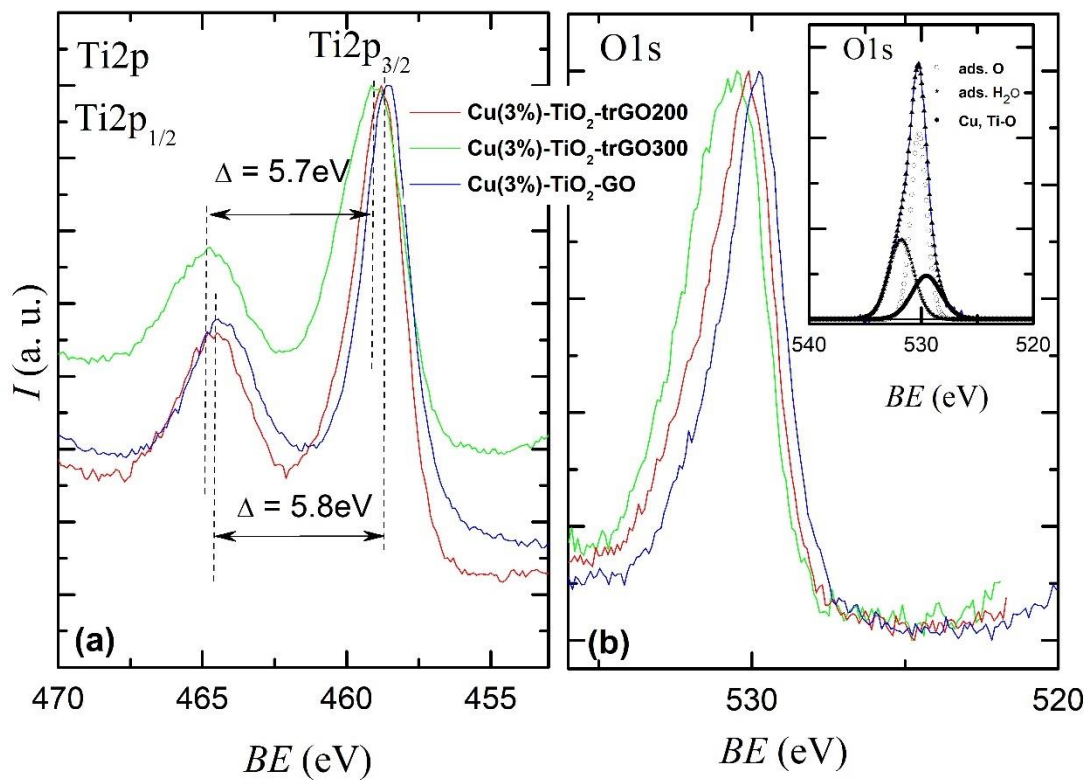

**Figure S4.** (a). Ti2p XPS for the investigated samples. Dashed line marks the spin orbit splitting of the Ti2p<sub>3/2</sub> and Ti2p<sub>1/2</sub> components. (b) O1s high resolution spectra for the investigated samples. Inset shows the deconvolution of O1s spectra for Cu(3%)-TiO<sub>2</sub>-GO sample, as an exemplification for the identified chemical bonds at the surface of the sample.

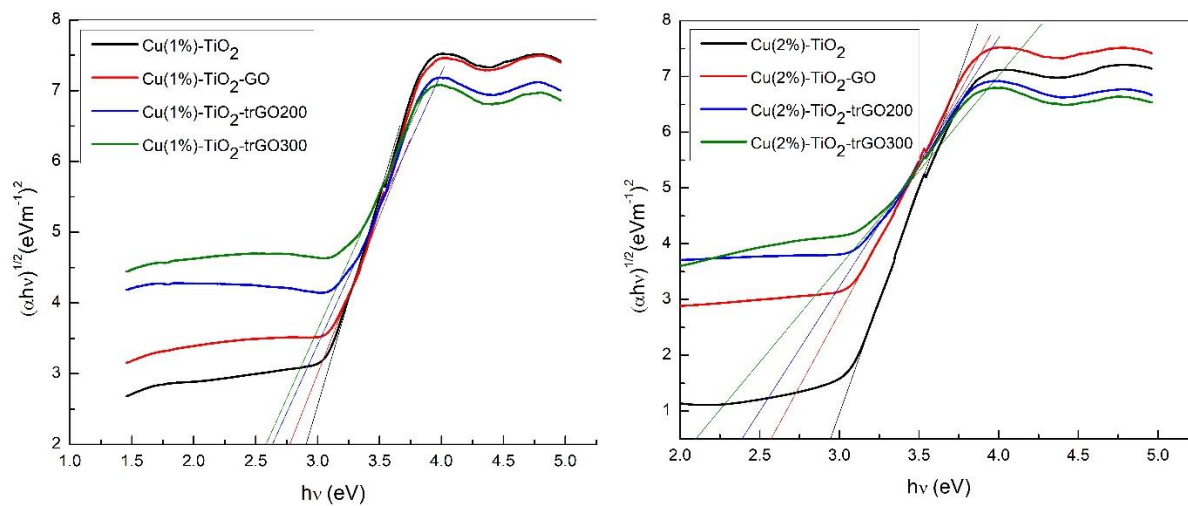

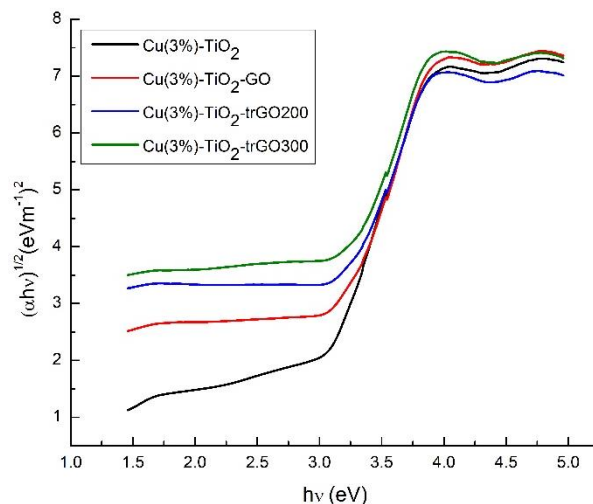

**Figure S5.** Tauc plots of all the analyzed samples (with 1%, 2% or 3% copper content).

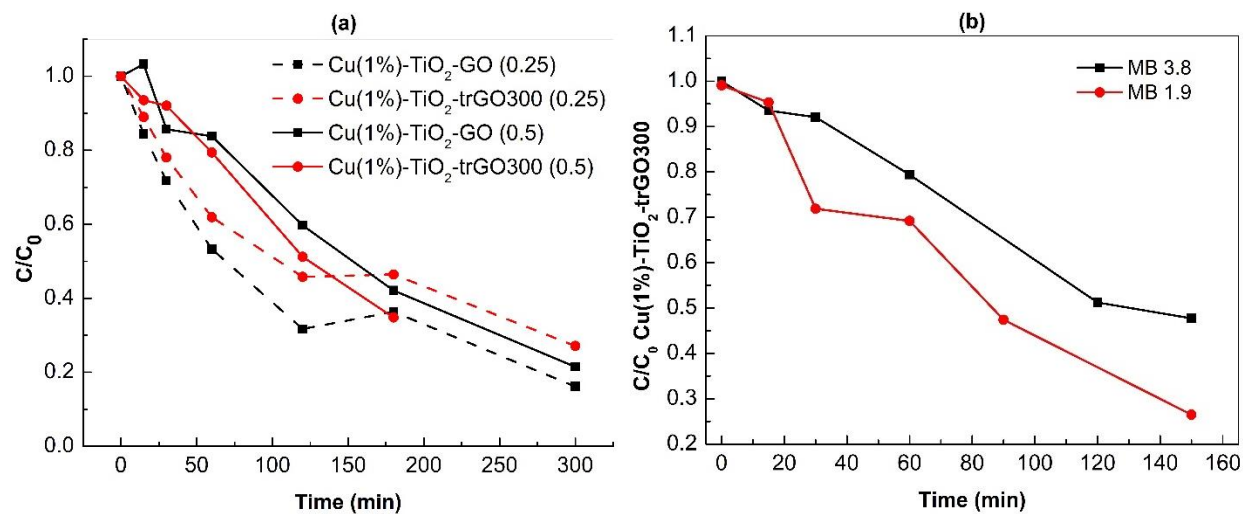

**Figure S6.** Residual ratio of MB (starting 5.5 mg/L) after UV-A irradiation (at 0.5 and 0.25 mg/mL photocatalyst dose) (a); the starting MB concentration of 3.8 and 1.9 mg/L (b).

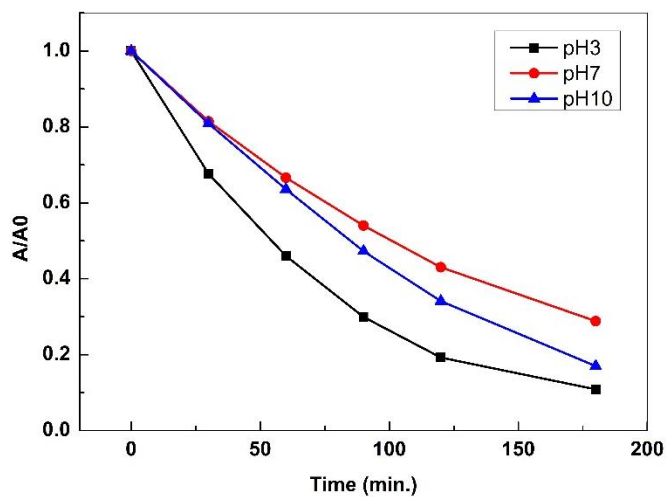

**Figure S7.** The pH influence over the residual ratio of MB (starting 5.5 mg/L) after UV-A irradiation in the presence of Cu(1%)-TiO<sub>2</sub>-trGO300 photocatalyst.

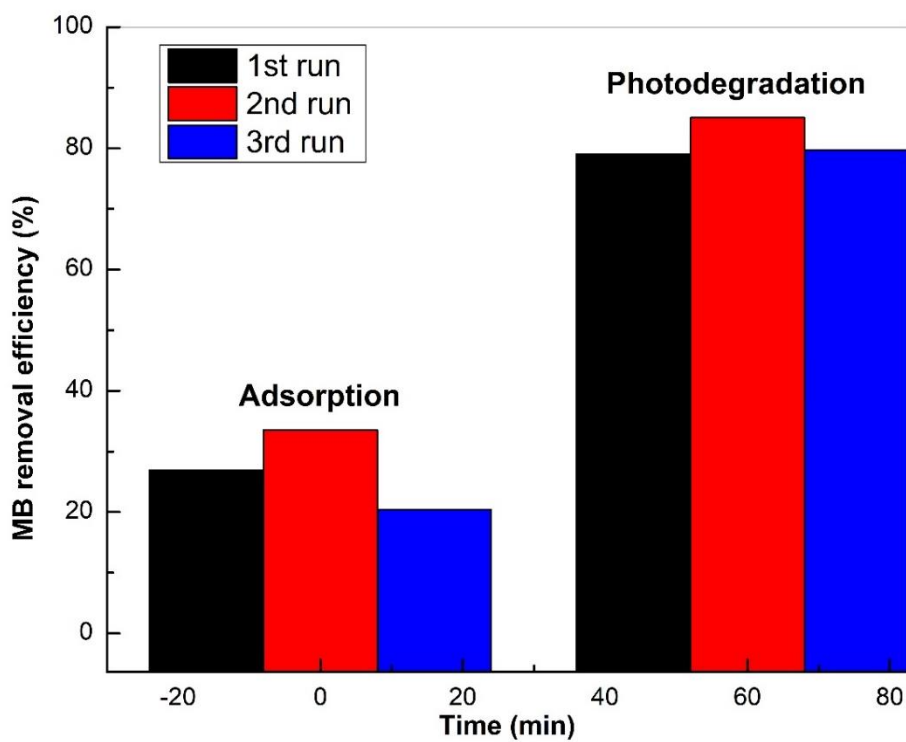

**Figure S8.** Recyclability study for Cu(1%)-TiO<sub>2</sub>-trGO300, 5.5 mg/L MB solution pH = 7 (30 minute dark and 1 hour irradiation with UVA light)

**Table S1.** Elemental concentration at the surface of the investigated samples determined from XPS survey spectra of the analyzed samples.

| Sample                                | Elemental concentration |      |      |      |
|---------------------------------------|-------------------------|------|------|------|
|                                       | Cu                      | O    | C    | Ti   |
| <b>Cu(3%)-TiO<sub>2</sub>-GO</b>      | 2                       | 46.8 | 36.8 | 14.1 |
| <b>Cu(3%)-TiO<sub>2</sub>-trGO200</b> | 4.2                     | 45.8 | 34.8 | 15   |
| <b>Cu(3%)-TiO<sub>2</sub>-trGO300</b> | 3.8                     | 47.9 | 33.5 | 14.6 |

**Table S2.** Deconvolution components with the corresponding ratio determined from high resolution Cu2p spectra of the analyzed samples.

| Sample                                |                            | Cu2p<br>Cu <sub>2</sub> O | CuO     | Satellite |
|---------------------------------------|----------------------------|---------------------------|---------|-----------|
| <b>Cu(3%)-TiO<sub>2</sub>-GO</b>      | Binding energy (eV)        | 932eV                     | 933.3eV | 942.3eV   |
|                                       | Relative concentration (%) | 51.6%                     | 31%     |           |
| <b>Cu(3%)-TiO<sub>2</sub>-trGO200</b> | Binding energy (eV)        | 932.2eV                   | 934eV   | 942eV     |
|                                       | Relative concentration (%) | 20.6%                     | 55.6%   |           |
| <b>Cu(3%)-TiO<sub>2</sub>-trGO300</b> | Binding energy (eV)        | 932.5eV                   | 934.4eV | 943 eV    |
|                                       | Relative concentration (%) | 22.7%                     | 53.2%   |           |

**Table S3.** Data obtained from the deconvolution of the C1s peaks of the investigated samples.

|                                       |         |         |         |         |
|---------------------------------------|---------|---------|---------|---------|
| <b>Cu(3%)-TiO<sub>2</sub>-GO</b>      |         |         |         |         |
| binding energy                        | 284.2eV | 284.6eV | 285.8eV | 288eV   |
| Relative intensity                    | 16%     | 26.2%   | 50.4%   | 7.4%    |
| <b>Cu(3%)-TiO<sub>2</sub>-trGO200</b> |         |         |         |         |
| binding energy                        | 284eV   | 284.7eV | 285.8eV | 287.8eV |
| Relative intensity                    | 20.4%   | 37.5%   | 26.6%   | 15.8%   |
| <b>Cu(3%)-TiO<sub>2</sub>-trGO300</b> |         |         |         |         |
| binding energy                        | 284.1eV | 285.1eV | 286.3eV | 288.5eV |
| Relative intensity                    | 38%     | 30.7%   | 30.5%   | 7.9%    |

**Table S4.** The adsorption isotherm models (Langmuir, Freundlich and Temkin) parameters for MB on the studied photocatalysts

| Thermodynamic model | Parameters              | Cu(1%)-TiO <sub>2</sub> -GO | Cu(1%)-trGO200 | Cu(1%)-TiO <sub>2</sub> -trGO300 | Cu(3%)-TiO <sub>2</sub> -GO | Cu(3%)-TiO <sub>2</sub> -trGO200 | Cu(3%)-TiO <sub>2</sub> -trGO300 |
|---------------------|-------------------------|-----------------------------|----------------|----------------------------------|-----------------------------|----------------------------------|----------------------------------|
| <b>Langmuir</b>     | q <sub>max</sub> (mg/g) | -15.06                      | 8.53           | 10.66                            | 56.6                        | -264.5                           | -37.55                           |

|                   |                                  |                |               |                |         |               |                |
|-------------------|----------------------------------|----------------|---------------|----------------|---------|---------------|----------------|
|                   | $K_L(\text{L/mg})$               | -0.118         | 0.3193        | 0.2453         | 0.0628  | -0.0135       | -0.0891        |
|                   | $R_L$                            | 1.02           | 0.6622        | 0.7181         | 0.878   | 1.03          | 1.244          |
|                   | $R^2$                            | <b>0.84955</b> | <b>0.9746</b> | <b>0.90445</b> | 0.8512  | 0.7969        | 0.70818        |
| <b>Freundlich</b> | $K_F (\text{mg/g (L/mg)}^{1/n})$ | 3.236          | 3.4972        | 3.4483         | 2.1017  | 2.0328        | 2.0895         |
|                   | $1/n$                            | 0.78405        | 0.8288        | 0.83586        | 0.94432 | 0.68845       | 0.6778         |
|                   | $R^2$                            | 0.7652         | 0.7446        | 0.70597        | 0.68694 | <b>0.9166</b> | <b>0.81689</b> |
